# Supplementary material
Source: HighWire-hosted journal article supplement (https://ijgc.bmj.com/content/31/3/387)
Supplement: inline-supplementary-material-1 [file inline-supplementary-material-1.pdf]

## Supplementary appendix

| Database | Strategy search                                                                                                                                                                                                                                                                                                                                                                                                                                                                                                                                                                                                                                                                                                                                                                                                                                                                                                                                                                                                                                                                                                                                                                                                                                                                                                                                                                                                                                                                                                                                                                                           | Field search                        | Filters                                                            | Studies n |
|----------|-----------------------------------------------------------------------------------------------------------------------------------------------------------------------------------------------------------------------------------------------------------------------------------------------------------------------------------------------------------------------------------------------------------------------------------------------------------------------------------------------------------------------------------------------------------------------------------------------------------------------------------------------------------------------------------------------------------------------------------------------------------------------------------------------------------------------------------------------------------------------------------------------------------------------------------------------------------------------------------------------------------------------------------------------------------------------------------------------------------------------------------------------------------------------------------------------------------------------------------------------------------------------------------------------------------------------------------------------------------------------------------------------------------------------------------------------------------------------------------------------------------------------------------------------------------------------------------------------------------|-------------------------------------|--------------------------------------------------------------------|-----------|
| PubMed   | <p>(((((patient*[Title/Abstract] AND ("cervical cancer*[Title/Abstract] OR "cervix cancer*[Title/Abstract] OR "uterine cervical neoplasm*[Title/Abstract] OR "uterine cervical cancer"[Title/Abstract] OR "cervix neoplasm*[Title/Abstract] OR "early-stage cervical cancer"[Title/Abstract] OR "early cervical cancer") AND Title/Abstract)) AND ("neoadjuvant chemotherapy"[Title/Abstract] OR "neo-adjuvant chemotherapy"[Title/Abstract] OR "neoadjuvant therapy"[Title/Abstract] OR "preoperative chemotherapy"[Title/Abstract] OR "conservative surgery"[Title/Abstract] OR "fertility-sparing surgery"[Title/Abstract] OR surgery[Title/Abstract] OR trachelectom*[Title/Abstract] OR "radical trachelectomy"[Title/Abstract] OR "abdominal trachelectomy"[Title/Abstract] OR "abdominal radical trachelectomy"[Title/Abstract])) OR ("laparoscopic trachelectomy"[Title/Abstract] OR "laparoscopic radical trachelectomy"[Title/Abstract] OR "robotic trachelectomy"[Title/Abstract] OR "robotic radical trachelectomy"[Title/Abstract] OR "vaginal trachelectomy"[Title/Abstract] OR "vaginal radical trachelectomy"[Title/Abstract] OR conization*[Title/Abstract] OR "cone resection*[Title/Abstract])) AND ("fertility preservation*" OR "fertility-preserving" OR fertility OR fecundity OR fertilization OR pregnanc* OR "pregnancy attempted" OR recurrence* OR neoplasm* OR "neoplasm recurrence*" OR death OR survival) AND ((Case Reports[ptyp] OR Observational Study[ptyp] OR Randomized Controlled Trial[ptyp]) AND ("1985/01/01"[PDat] : "2020/12/26"[PDat]) AND English[lang])</p> | Title/Abstract<br>And<br>All Fields | Article types<br>Publication dates<br>Languages                    | 545       |
| Embase   | <p>((patient*:ab,ti AND ('cervical cancer*':ab,ti OR 'cervix cancer*':ab,ti OR 'uterine cervical neoplasm*':ab,ti OR 'uterine cervical cancer':ab,ti OR 'cervix neoplasm*':ab,ti OR 'early-stage cervical cancer':ab,ti OR 'early cervical cancer':ab,ti) AND ('neoadjuvant chemotherapy':ab,ti OR 'neo-adjuvant chemotherapy':ab,ti OR 'neoadjuvant therapy':ab,ti OR 'preoperative chemotherapy':ab,ti OR 'conservative surgery':ab,ti OR 'fertility-sparing surgery':ab,ti OR surgery:ab,ti OR trachelectom*':ab,ti OR 'radical trachelectomy':ab,ti OR 'abdominal trachelectomy':ab,ti OR 'abdominal radical trachelectomy':ab,ti OR 'laparoscopic trachelectomy':ab,ti OR 'laparoscopic radical trachelectomy':ab,ti OR 'robotic trachelectomy':ab,ti OR 'robotic radical trachelectomy':ab,ti OR 'vaginal trachelectomy':ab,ti OR 'vaginal radical trachelectomy':ab,ti OR conization*':ab,ti OR 'cone resection*':ab,ti) AND ('fertility preservation*': OR 'fertility-preserving' OR fertility OR fecundity OR fertilization OR pregnanc* OR 'pregnancy attempted' OR recurrence* OR neoplasm* OR 'neoplasm recurrence*': OR death OR survival) AND [1-1-1985]/sd NOT [1-4-2020]/sd AND [1985-2020]/py) AND ('case report'/de OR 'observational study'/de OR 'randomized controlled trial'/de OR 'retrospective study'/de) AND 'article'/it AND [english]/lim</p>                                                                                                                                                                                                                                 | Title/Abstract<br>And<br>All Fields | Study types<br>Publication types<br>Publication years<br>Languages | 919       |

| Database | Strategy search                                                                                                                                                                                                                                                                                                                                                                                                                                                                                                                                                                                                                                                                                                                                                                                                                                                                                                                                                                                                                                                                                                                                                                                                                                                                                                                                                                                                                                                                                                                                                                                                       | Field search                            | Filters                                                                                | Studies n |
|----------|-----------------------------------------------------------------------------------------------------------------------------------------------------------------------------------------------------------------------------------------------------------------------------------------------------------------------------------------------------------------------------------------------------------------------------------------------------------------------------------------------------------------------------------------------------------------------------------------------------------------------------------------------------------------------------------------------------------------------------------------------------------------------------------------------------------------------------------------------------------------------------------------------------------------------------------------------------------------------------------------------------------------------------------------------------------------------------------------------------------------------------------------------------------------------------------------------------------------------------------------------------------------------------------------------------------------------------------------------------------------------------------------------------------------------------------------------------------------------------------------------------------------------------------------------------------------------------------------------------------------------|-----------------------------------------|----------------------------------------------------------------------------------------|-----------|
| Scopus   | (TITLE ( patient* AND ( "cervical cancer*" OR "cervix cancer*" OR "uterine cervical neoplasm*" OR "uterine cervical cancer" OR "cervix neoplasm*" OR "early-stage cervical cancer" OR "early cervical cancer" ) ) AND TITLE-ABS-KEY ( "neoadjuvant chemotherapy" OR "neo-adjuvant chemotherapy" OR "neoadjuvant therapy" OR "preoperative chemotherapy" OR "conservative surgery" OR "fertility-sparing surgery" OR surgery OR trachelectom* ) OR TITLE-ABS-KEY ( "radical trachelectomy" OR "abdominal trachelectomy" OR "abdominal radical trachelectomy" OR "laparoscopic trachelectomy" ) ) OR TITLE-ABS-KEY ( "laparoscopic radical trachelectomy" OR "robotic trachelectomy" OR "robotic radical trachelectomy" OR "vaginal trachelectomy" OR "vaginal radical trachelectomy" OR conization* OR "cone resection*" ) AND TITLE-ABS-KEY ( "fertility preservation*" OR "fertility-preserving" OR fertility OR fecundity OR fertilization OR pregnanc* OR "pregnancy attempted" OR recurrence* OR neoplasm* OR "neoplasm recurrence*" OR death OR survival ) ) AND PUBYEAR > 1984 AND PUBYEAR < 2021 AND ( LIMIT-TO ( DOCTYPE , "ar" ) ) AND ( LIMIT-TO ( LANGUAGE , "English" ) )                                                                                                                                                                                                                                                                                                                                                                                                                                 | Article title,<br>Abstract,<br>Keywords | Date range<br>publication<br>Document type<br>Publication stage<br>(final)<br>Language | 631       |
| Ovid     | <p>1 (((patient* and ("cervical cancer*" or "cervix cancer*" or "uterine cervical neoplasm*" or "uterine cervical cancer" or "cervix neoplasm*" or "early-stage cervical cancer" or "early cervical cancer") and ("neoadjuvant chemotherapy" or "neo-adjuvant chemotherapy" or "neoadjuvant therapy" or "preoperative chemotherapy" or "conservative surgery" or "fertility-sparing surgery" or surgery or trachelectom* or "radical trachelectomy" or "abdominal trachelectomy" or "abdominal radical trachelectomy")) or ("laparoscopic trachelectomy" or "laparoscopic radical trachelectomy" or "robotic trachelectomy" or "robotic radical trachelectomy" or "vaginal trachelectomy" or "vaginal radical trachelectomy" or conization* or "cone resection*")) and ("fertility preservation*" or "fertility-preserving" or fertility or fecundity or fertilization or pregnanc* or "pregnancy attempted" or recurrence* or neoplasm* or "neoplasm recurrence*" or death or survival)).ab.</p> <p>2 limit 1 to yr="1985 - 2020" [Limit not valid in DARE; records were retained]</p> <p>3 limit 2 to english language [Limit not valid in Books@Ovid,Journals@Ovid,Your Journals@Ovid,ACP Journal Club,CDSR,CCA,CLCMR,DARE; records were retained]</p> <p>4 limit 3 to (case report or randomized controlled trial) [Limit not valid in Books@Ovid,Journals@Ovid,Your Journals@Ovid,ACP Journal Club,CDSR,CCA,CLCMR,DARE,CLHTA,CLEED,Global Health,Ovid MEDLINE(R),Ovid MEDLINE(R) Daily Update,Ovid MEDLINE(R) In-Process,Ovid MEDLINE(R) Publisher; records were retained]</p> <p>5 remove duplicates from 4</p> | Abstract                                | Publication years<br>Language<br>Publication types<br>Remove duplicates                | 1236      |

**Table S1.** Characterization of the strategy search
